# Supplementary material for: Molecular Design and Property Prediction of Sterically Confined Polyimides for Thermally Stable and Transparent Materials
Source: MDPI journal article supplement (doi:10.3390/polym10060630), 2018-06-07
Supplement: s1 [file s1]

# Molecular Design and Property Prediction of Sterically Confined Polyimides for Thermally Stable and Transparent Materials

Ki-Ho Nam <sup>1,†</sup>, Hoi Kil Choi <sup>1,†</sup>, Hyeonuk Yeo <sup>2</sup>, Nam-Ho You <sup>1</sup>, Bon-Cheol Ku <sup>1,\*</sup>, and Jaesang Yu <sup>1,\*</sup>

<sup>1</sup> Institute of Advanced Composite Materials, Korea Institute of Science and Technology (KIST), Jeonbuk 565-902, Republic of Korea

<sup>2</sup> Department of Chemistry Education, Chemistry Building, Kyungpook National University, Chemistry Building, 80, Daehak-ro, Buk-gu, Daegu 41566, Republic of Korea

## Author Information

---

\* Corresponding authors.

† These authors contributed equally.

## List of Contents for Supplementary Material:

---

**Figure S1.** Calculated molecular orbitals and the corresponding energy levels of the basic units of PEsI-H and PEsI-(CH<sub>3</sub>)<sub>x</sub> model compounds (B3LYP/6-31G).

**Figure S2.** DMA thermograms of the PEsI-H and PEsI-(CH<sub>3</sub>)<sub>2</sub> films (1 Hz, 3 °C min<sup>-1</sup>). (a) storage modulus and (b) tan δ.

**Figure S3.** MSD of the structures as a function of time for the PEI systems. (a) PEI-(CH<sub>3</sub>)<sub>1</sub>, (b) PEI-(CH<sub>3</sub>)<sub>2</sub>, (c) PEI-(CH<sub>3</sub>)<sub>3</sub>, (d) PEI-(CF<sub>3</sub>)<sub>1</sub>, (e) PEI-(CF<sub>3</sub>)<sub>2</sub>, and (f) PEI-(CF<sub>3</sub>)<sub>3</sub>.

**Figure S4.** MSD curves as a function of temperature at 50 ps long time for the unit cell of PEsI systems.

**Figure S5.** Torsion angle distributions of the PEsI-H systems by constant-NVT MD simulation at 400 and 850 K.

**Table S1.** Thermal properties of fluorinated PIs

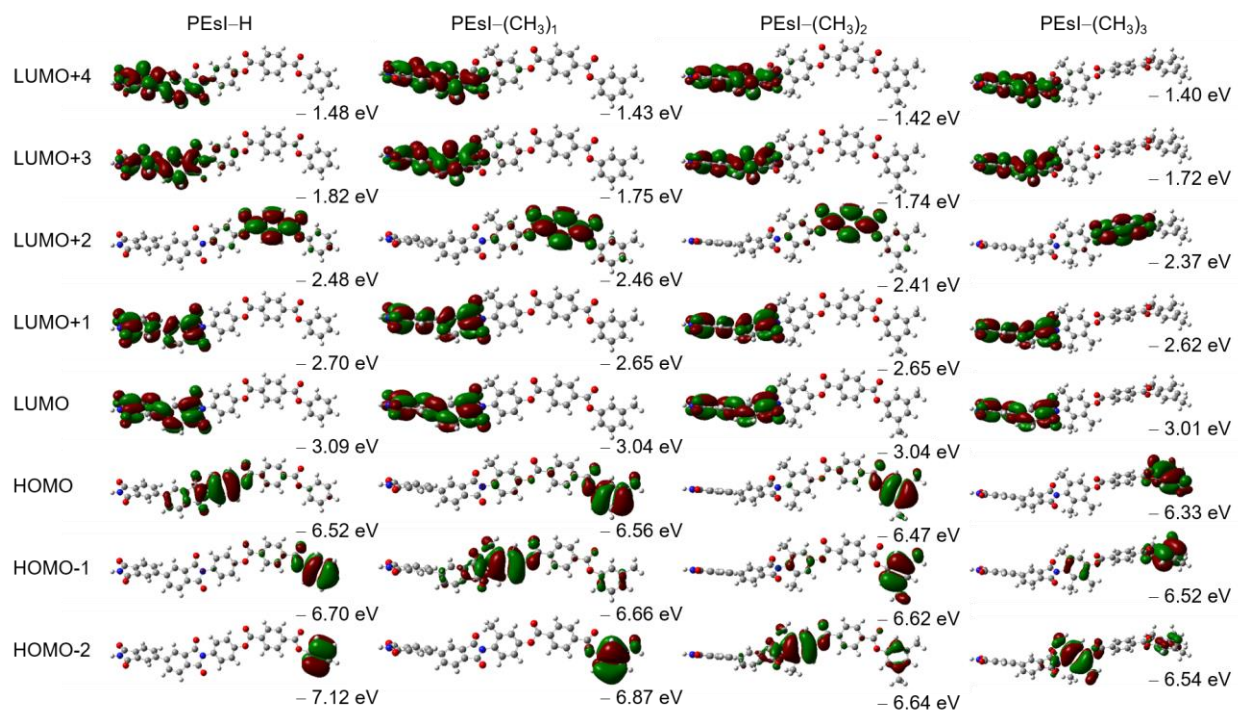

**Figure S1.** Calculated molecular orbitals and the corresponding energy levels of the basic units of PEsI-H and PEsI-(CH<sub>3</sub>)<sub>x</sub> model compounds (B3LYP/6-31G).

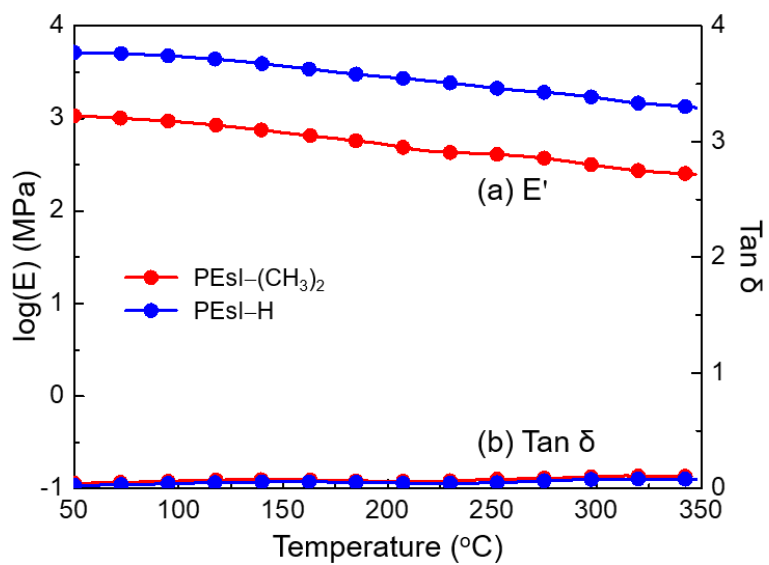

**Figure S2.** DMA thermograms of the PEsI-H and PEsI- $(CH_3)_2$  films (1 Hz, 3 °C min<sup>-1</sup>). (a) storage modulus and (b)  $\tan \delta$ .

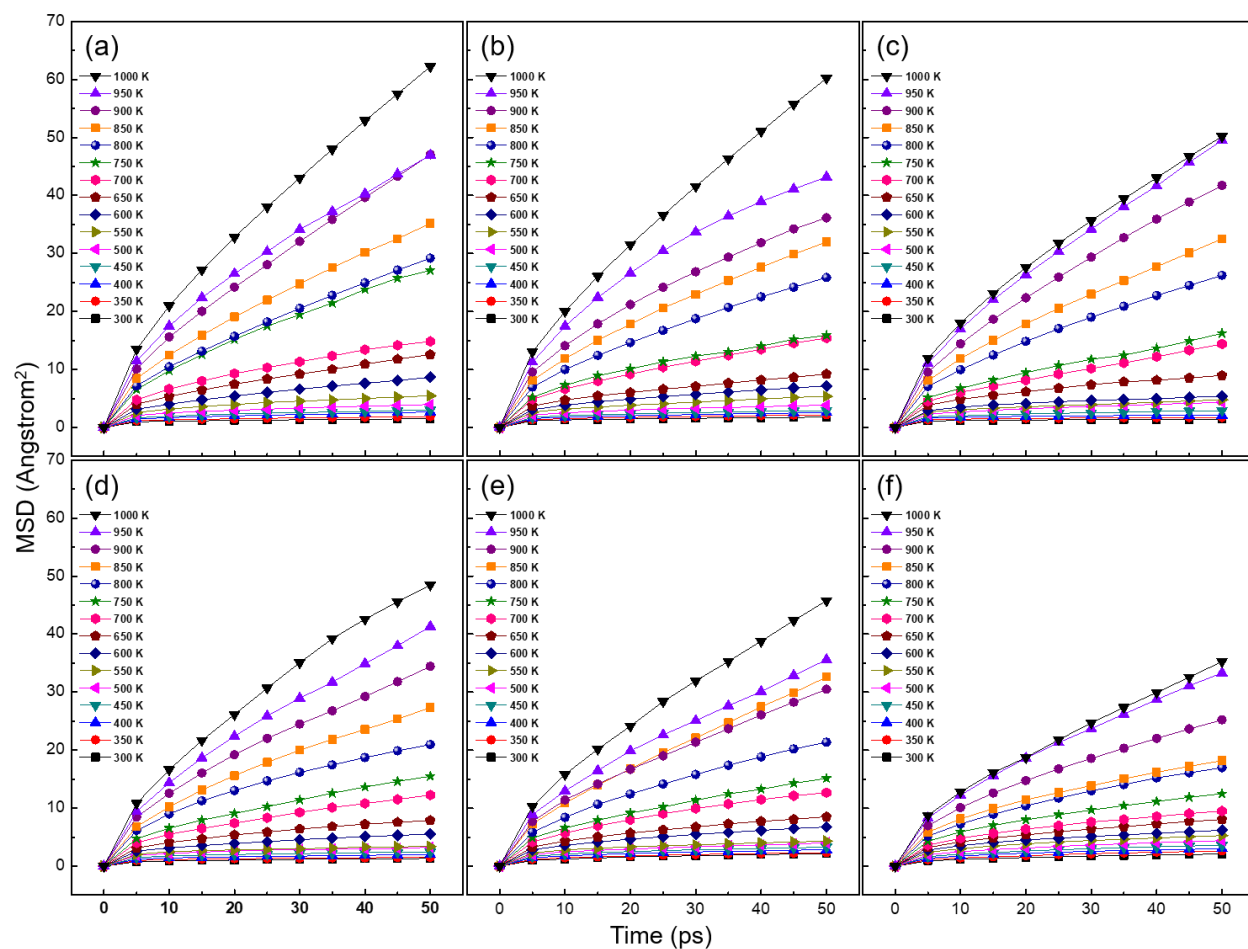

**Figure S3.** MSD of the structures as a function of time for the PEI systems. (a) PEI-(CH<sub>3</sub>)<sub>1</sub>, (b) PEI-(CH<sub>3</sub>)<sub>2</sub>, (c) PEI-(CH<sub>3</sub>)<sub>3</sub>, (d) PEI-(CF<sub>3</sub>)<sub>1</sub>, (e) PEI-(CF<sub>3</sub>)<sub>2</sub>, and (f) PEI-(CF<sub>3</sub>)<sub>3</sub>.

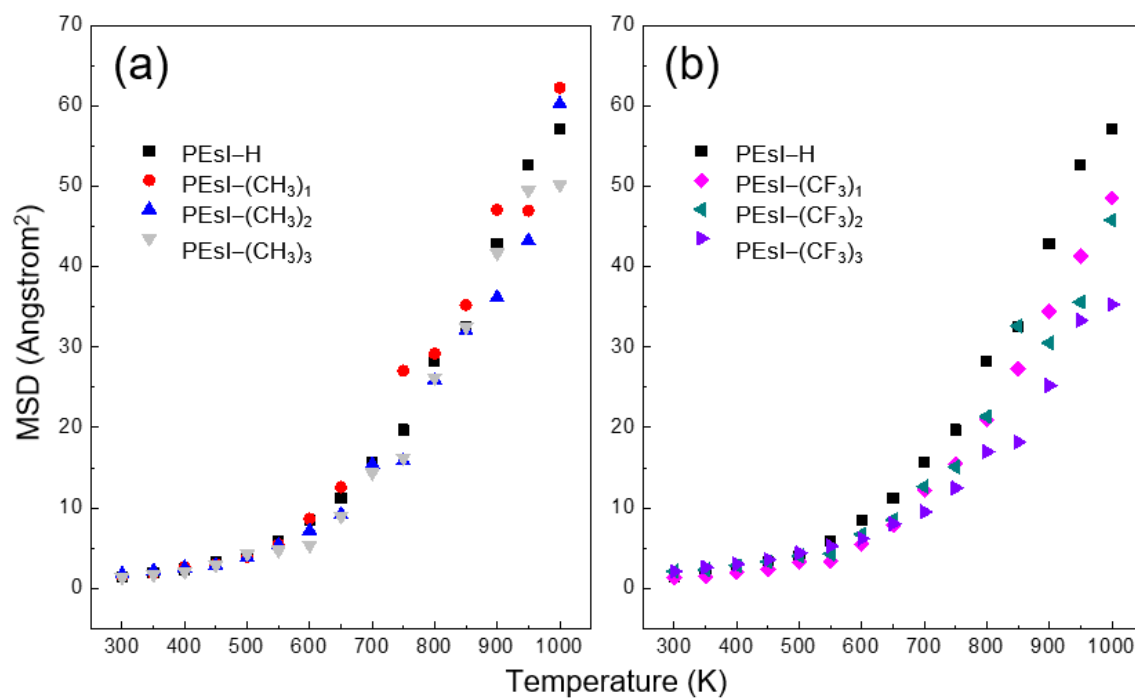

**Figure S4.** MSD curves as a function of temperature at 50 ps long time for the unit cell of PEsI systems.

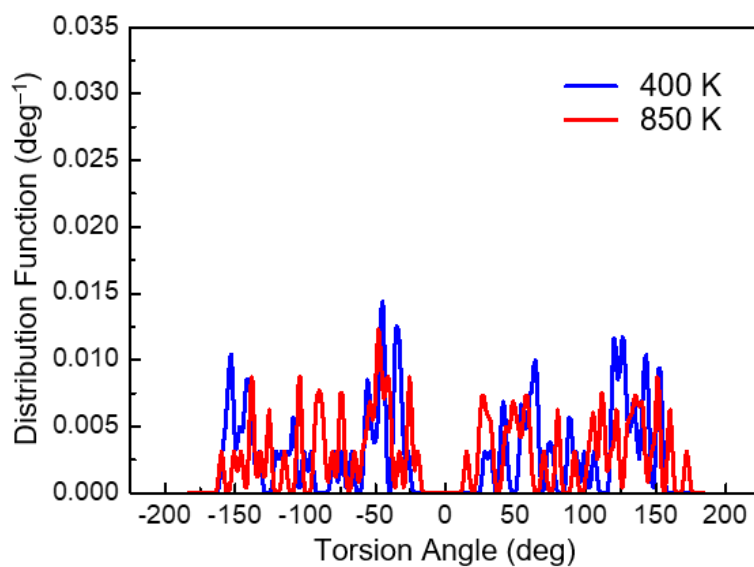

**Figure S5.** Torsion angle distributions of the PEsI–H systems by constant-NVT MD simulation at 400 and 850 K.

**Table S1.** Thermal properties of fluorinated PIs

| PI type                                                            | Molecular structure                                                                 | $T_g$<br>(K) | CTE<br>(ppm K <sup>-1</sup> ) | Reference                              |
|--------------------------------------------------------------------|-------------------------------------------------------------------------------------|--------------|-------------------------------|----------------------------------------|
| Fluorinated ester-bridged PI                                       | 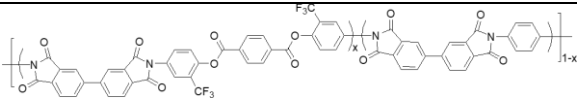  | 651          | 8.3                           | Yang, S.<br>et al. <sup>1</sup>        |
|                                                                    |   | 587          | 18.3                          |                                        |
|                                                                    |   |              |                               |                                        |
| PI containing pyridine and fluorinated units                       |    | 535          | 68                            | Shang, D.<br>et al. <sup>2</sup>       |
|                                                                    |    | 548          | 64                            |                                        |
|                                                                    |    | 538          | 67                            |                                        |
| PI derived from fluorinated tetracarboxylic dianhydride            |    | 543          | 8.3                           | Hasegawa,<br>M.<br>et al. <sup>3</sup> |
|                                                                    |  | 505          | 26.5                          |                                        |
| PI containing ether and fluorinated units                          |  | 544          | NA                            | Hsiao, S.<br>et al. <sup>4</sup>       |
| PI derived from multi-trifluoromethyl-substituted aromatic diamine |  | 512          | 62.1                          | Yang, S.<br>et al. <sup>5</sup>        |
| Our model compounds                                                |  | 731          | 12.8                          | This work                              |

## References

1. Chen, W.; Liu, F.; Ji, M.; Yang, S. Synthesis and characterization of low-CTE polyimide films containing trifluoromethyl groups with water-repellant characteristics. *High Perform. Polym.* **2017**, *29*, 501–512.
2. Dong, W.; Guan, Y.; Shang, D. Novel soluble polyimides containing pyridine and fluorinated units: Preparation, characterization, and optical and dielectric properties. *RSC Adv.* **2016**, *6*, 21662–21671.
3. Hasegawa, M.; Ishigami, T.; Ishii, J.; Sugiura, K.; Fujii, M. Solution-processable transparent polyimides with low coefficients of thermal expansion and self-orientation behavior induced by solution casting. *Eur, Polym. J.* **2013**, *49*, 3657–3672.
4. Hsiao, S.-H.; Yang, C.-P.; Chung, C.-L. Synthesis and characterization of novel fluorinated polyimides based on 2,7-bis(4-amino-2-trifluoromethylphenoxy)naphthalene. *J. Polym. Sci. Pol. Chem.* **2003**, *41*, 2001–2018.
5. Tao, L.; Yang, H.; Liu, J.; Fan, L.; Yang, S. Synthesis and characterization of highly optical transparent and low dielectric constant fluorinated polyimides. *Polymer* **2009**, *50*, 6009–6018.
